# Supplementary material for: Numerical Simulation on Thermoelectric Cooling of Core Power Devices in Air Conditioning
Source: MDPI journal article supplement (doi:10.3390/app13127274), 2023-06-19
Supplement: s1 [file s1]

# Supplementary Materials for

## **Numerical simulation on thermoelectric cooling of core power devices in air conditioning**

**This PDF file includes:**

Figures S1 to S4

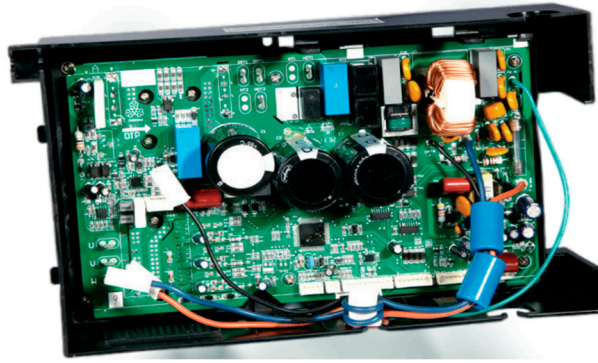

Figure S1. The optical photo of air conditioner circuit board

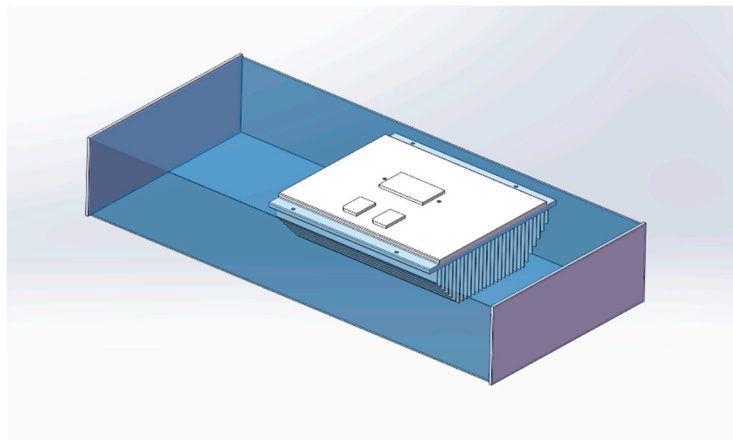

Figure S2. The CAD model of cooling system

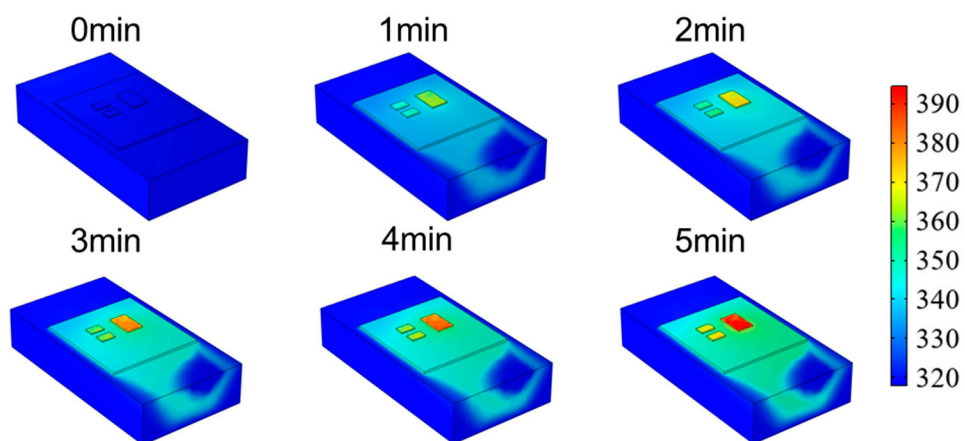

Figure S3. Temperature distribution of the system without TEC cooling at different times

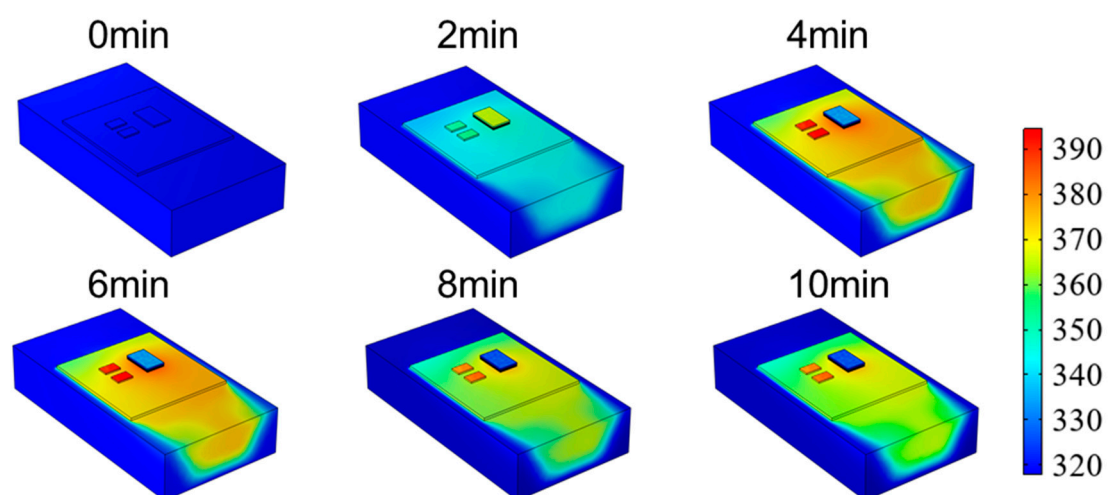

Figure S4. Temperature distribution of the system with TEC cooling at different times
